# Supplementary material
Source: publisher figshare collection journal article supplement (https://tandf.figshare.com/ndownloader/files/14629304)
Supplement: Supplementary file 1 [file 14629304]

**Supplemental Figure 1**

Influence analysis of psyllium supplementation on body weight

**Supplemental Figure 2**

Influence analysis of psyllium supplementation on BMI.

**Supplemental Figure 3**

Influence analysis of psyllium supplementation on WC.

**Supplemental Figure 4**


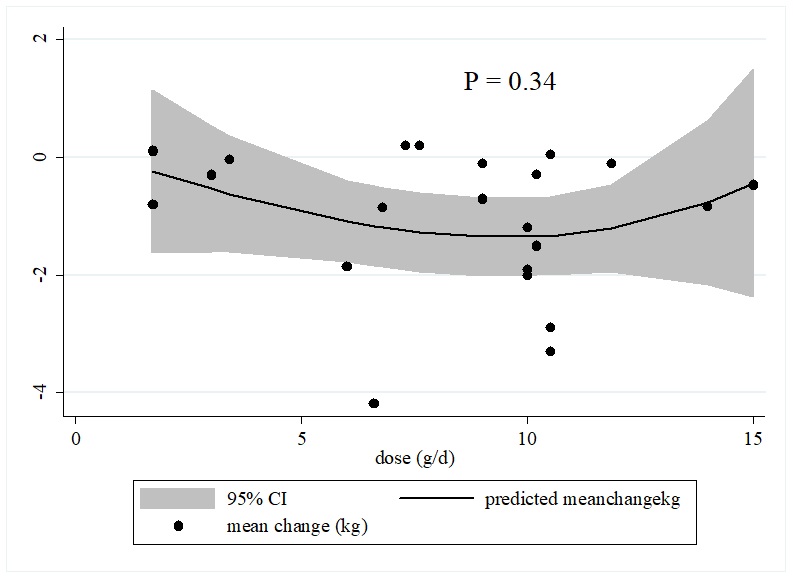


Non-linear dose-responses between psyllium supplementation and unstandardized mean difference in body weight

**Supplemental Figure 5**


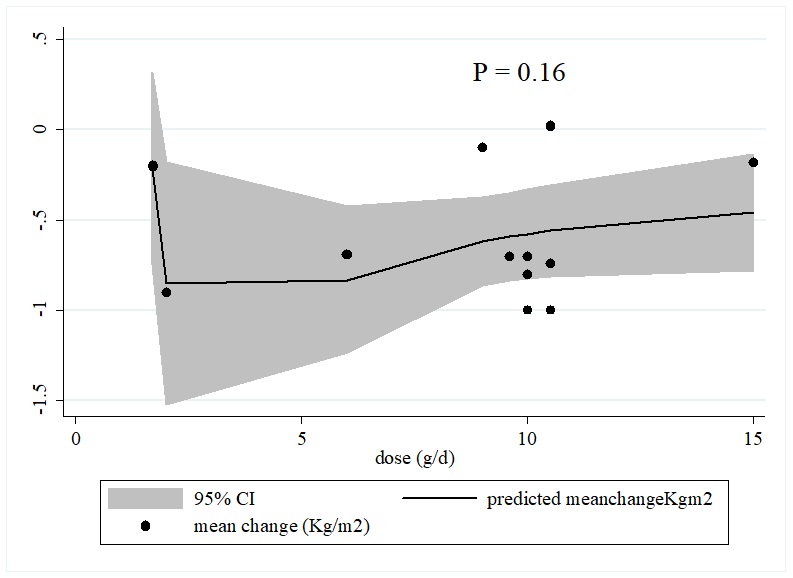


Non-linear dose-responses between psyllium supplementation and unstandardized mean difference in BMI

**Supplemental Figure 6**


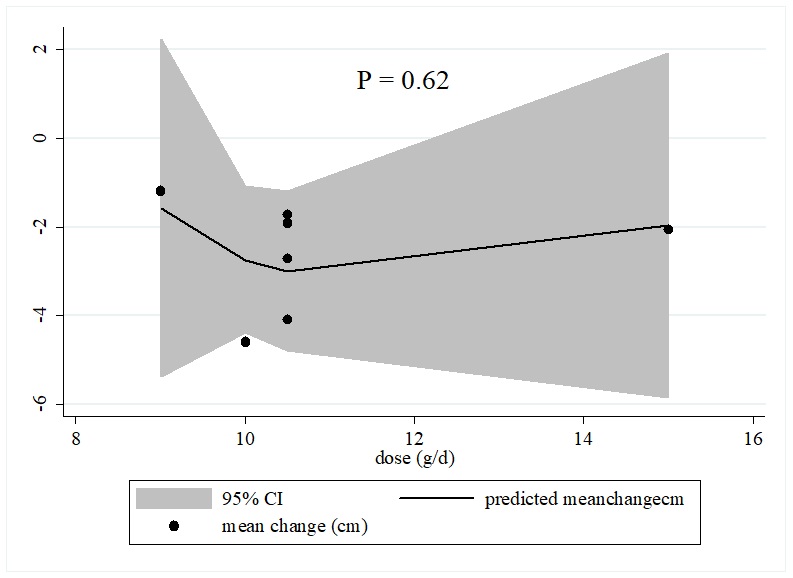


Non-linear dose-responses between psyllium supplementation and unstandardized mean difference in WC

**Supplemental Figure 7**


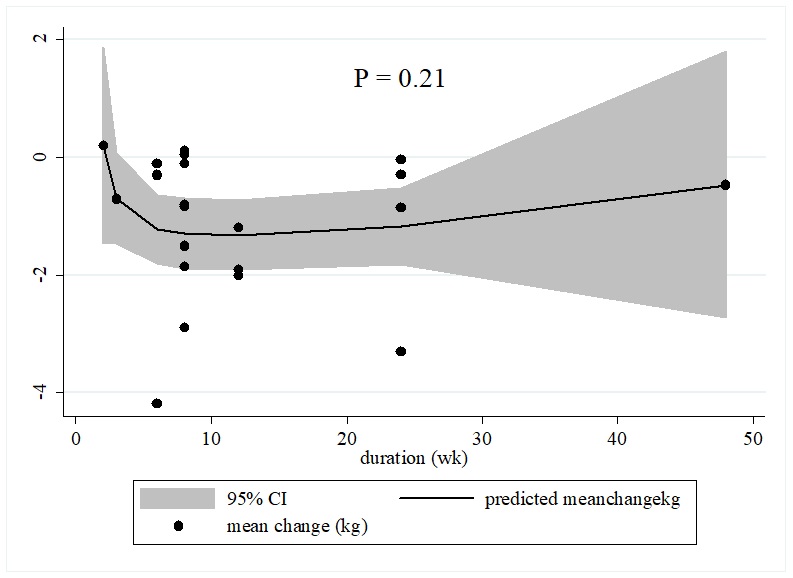


Non-linear dose-responses between duration of psyllium supplementation and unstandardized mean difference in body weight

**Supplemental Figure 8**


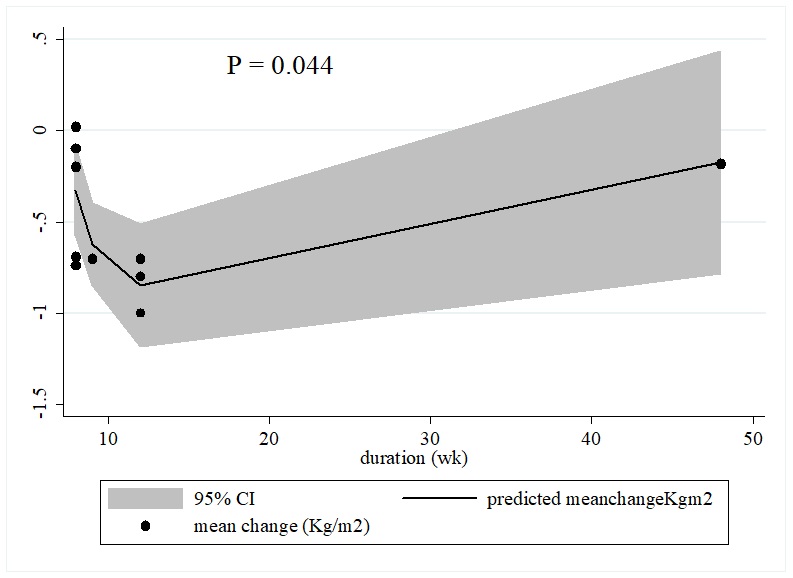


Non-linear dose-responses between duration of psyllium supplementation and unstandardized mean difference in BMI

**Supplemental Figure 9**


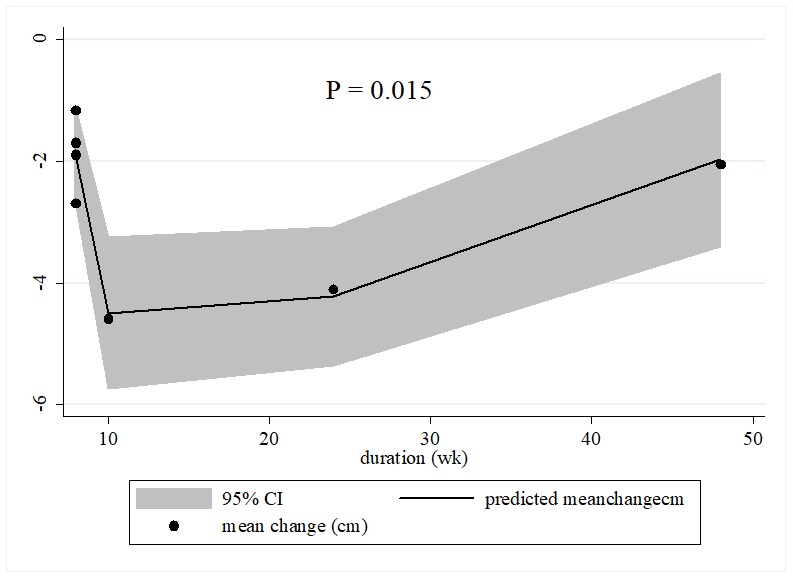


Non-linear dose-responses between duration of psyllium supplementation and unstandardized mean difference in WC

**Supplemental Figure 10**


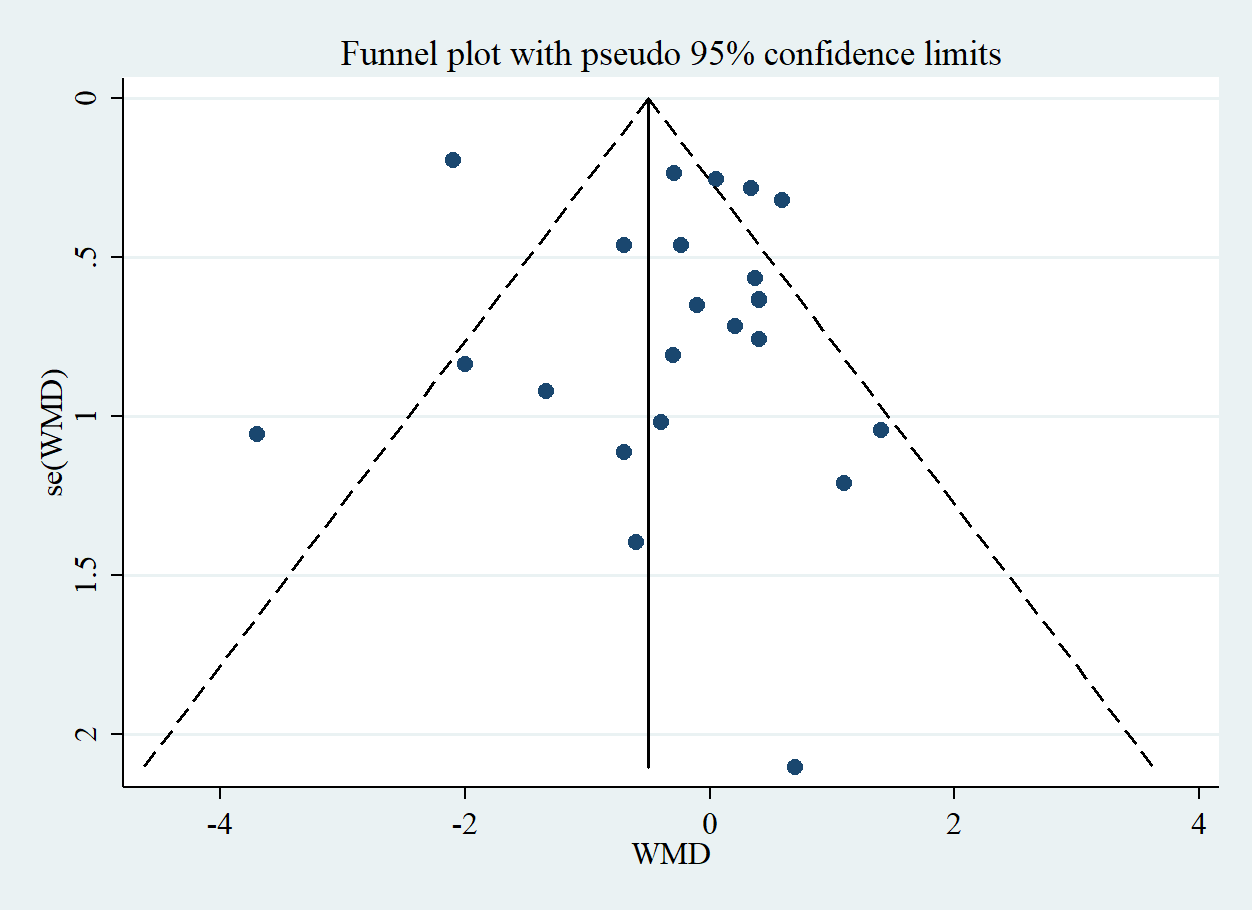


Funnel plot for assessing publication bias in the studies reporting the effect of psyllium on body weight

**Supplemental Figure 11**

**
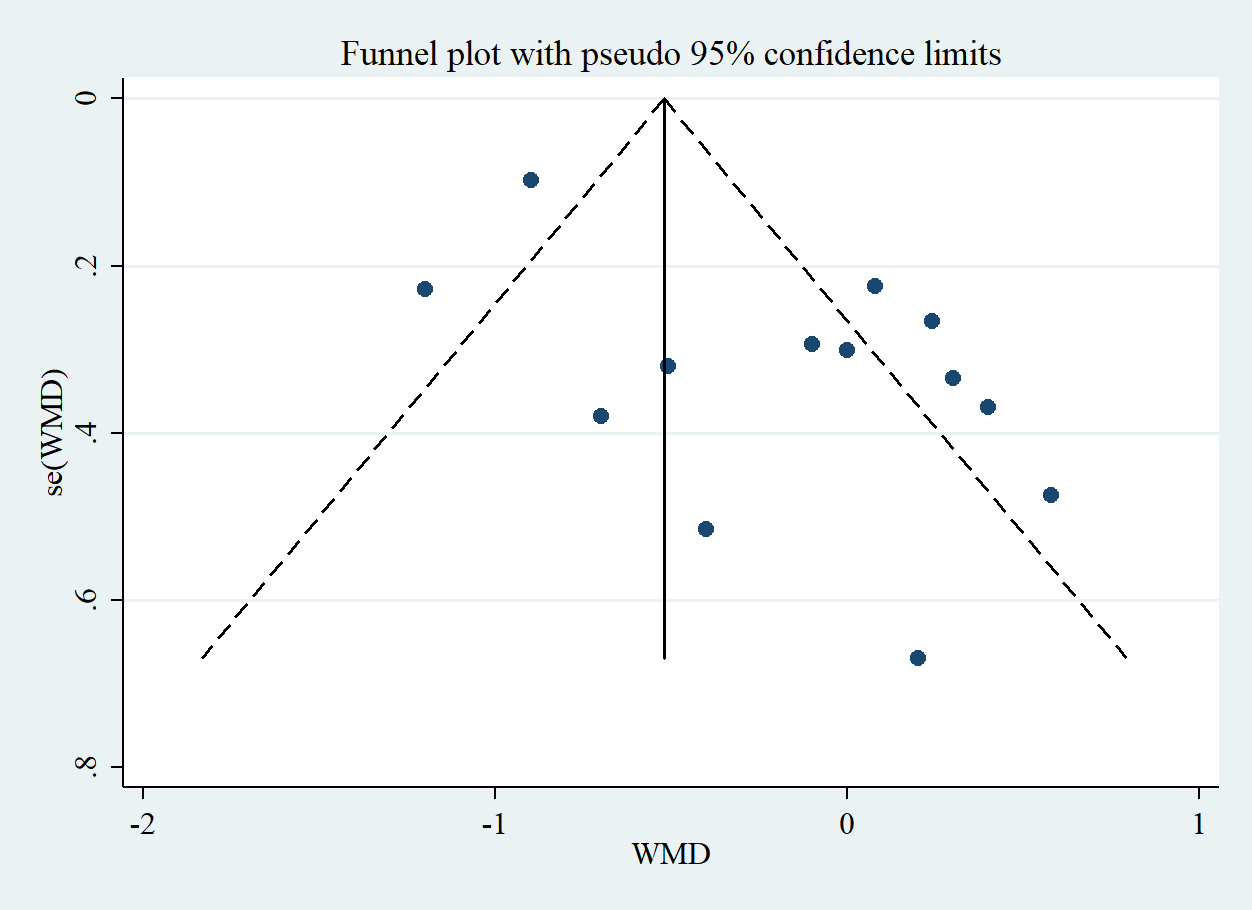
**

Funnel plot for assessing publication bias in the studies reporting the effect of psyllium on BMI

**Supplemental Figure 12**

**
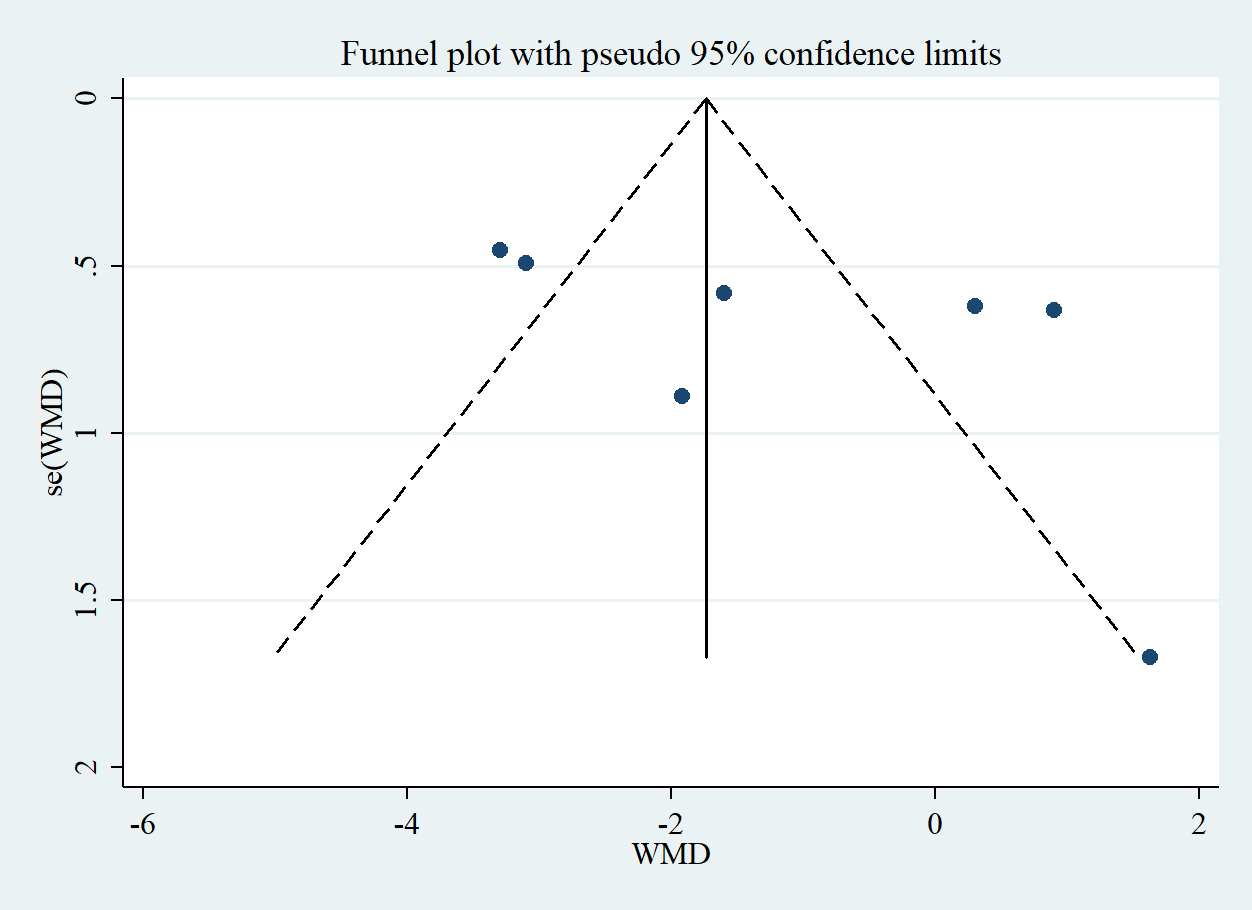
**

Funnel plot for assessing publication bias in the studies reporting the effect of psyllium on WC
